# Supplementary material for: In situ formation of 2-thiobarbituric acid incorporated g-C3N4 for enhanced visible-light-driven photocatalytic performance
Source: Royal Society of Chemistry journal article supplement (doi:10.1039/d1ra02121d), 2021-01-01
Supplement: d1ra02121d1.pdf [file d1ra02121d1.pdf]

## Supporting Information

### **In situ formation of 2-thiobarbituric acid incorporated g-C<sub>3</sub>N<sub>4</sub> for enhanced visible-light-driven photocatalytic performance**

Tingting Chen <sup>a#</sup>, Shan Hu <sup>a,b#</sup>, Quanfeng Xing <sup>a</sup>, Xiaofeng Yu <sup>c</sup>, Jinming Chen <sup>c</sup>, Xiaolong Li <sup>c</sup>, Xiuquan Xu <sup>c\*</sup>, Bo zhang <sup>a</sup>,

b

<sup>a</sup> *School of Environment and Safety Engineering, Jiangsu University, Zhenjiang 212013, PR China*

<sup>b</sup> *Jiangsu Province synergistic innovation center of modern agricultural equipment and technology, Zhenjiang 212013, PR China*

<sup>c</sup> *School of Pharmacy, Jiangsu University, Zhenjiang 212013, PR China*

□ Corresponding author.

*E-mail address:* xxq781026@ujs.edu.cn (X. Xu).

The XPS analysis was carried out to gain insight into the surface composition distribution and chemistry states of CN and the results were depicted in Fig. S1.

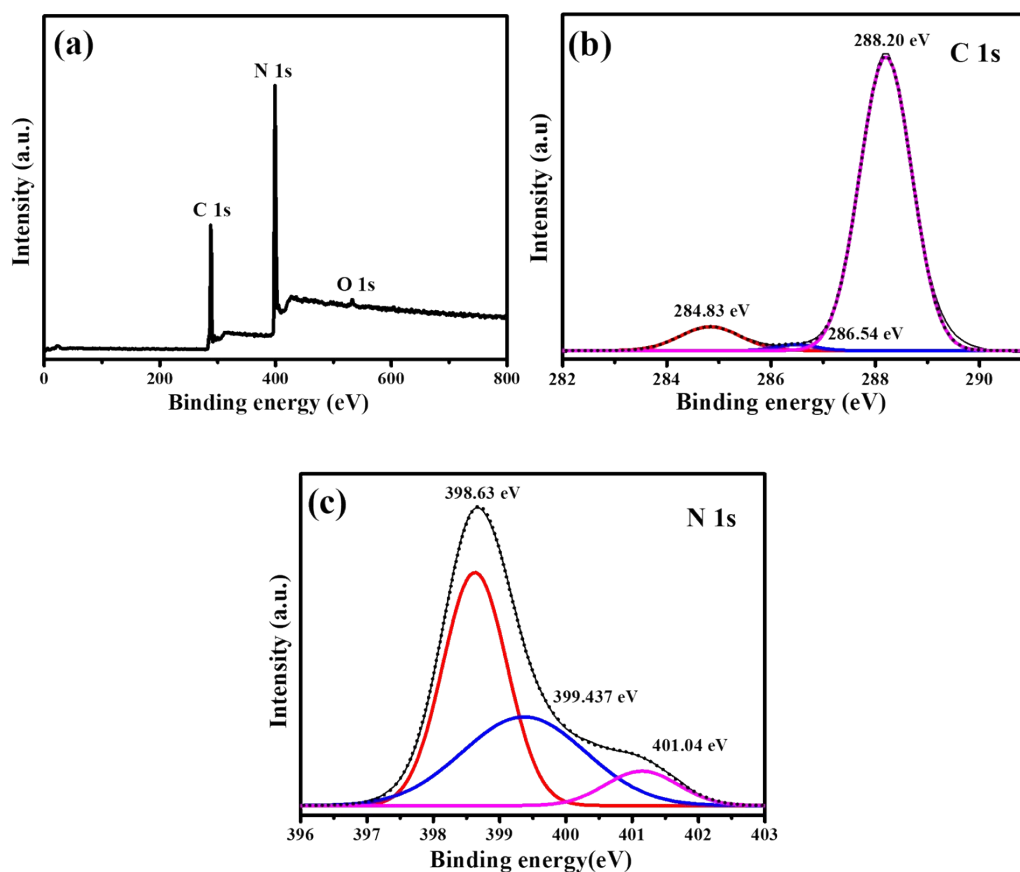

**Fig. S1.** Survey XPS spectra (a) and high-resolution XPS spectra of C 1 s (b), N 1 s (c) for CN.

For the C 1s region (Fig. S1b), the three independent peaks centered at 284.83, 286.54 and 288.20 eV could be assigned to the C–C, C–NH<sub>2</sub> and N–C=N groups. For the N 1s region (Fig. S1c), the signal of N 1s could be fitted with three peaks located at 398.63, 399.47 and 400.04 eV, which were mainly originated from the nitrogen atom bond in the C–N=C, (C)<sub>3</sub>–N and terminal –NH<sub>2</sub> groups, respectively.
